# Supplementary material
Source: ML conference proceedings conference paper supplement (https://proceedings.neurips.cc/paper_files/paper/2014/hash/99c5e07b4d5de9d18c350cdf64c5aa3d-Abstract.html)
Supplement: Supplementary file [file 99c5e07b4d5de9d18c350cdf64c5aa3d-Supplemental.zip]

---

# Stochastic Network Design in Bidirected Trees

## — Supplementary Material —

---

Xiaojian Wu<sup>1</sup>     Daniel Sheldon<sup>1,2</sup>     Shlomo Zilberstein<sup>1</sup>

<sup>1</sup> School of Computer Science, University of Massachusetts Amherst

<sup>2</sup> Department of Computer Science, Mount Holyoke College

**Lemma 2.** *If condition (7) holds,  $z(\pi) - \hat{z}(\pi) \leq \epsilon z(\pi)$  for an arbitrary policy  $\pi$ .*

*Proof.* To prove the lemma, we first use induction to prove the following statement:

$$z_u(\pi) - \hat{z}_u(\pi) \leq \epsilon z_u(\pi) \quad \forall u \in V$$

For the base case where  $u$  is a leaf vertex, we have  $z_u(\pi) = h_u^2$  and therefore the error  $z_u(\pi) - \hat{z}_u(\pi)$  is bounded by  $K_u^z = \frac{\epsilon}{3} z_u(\pi)$ .

For the induction step, assume that the statement holds for the two children  $v$  and  $w$  of  $u$ . To prove that it also holds for  $u$ , we consider the error introduced by **each term** in recurrence (6) that uses the rounded values  $\hat{\nu}_v(\pi)$  and  $\hat{\mu}_w(\pi)$  instead of the true values  $\nu_v(\pi)$  and  $\mu_w(\pi)$ . For the term  $\hat{\mu}_v(\pi) p_{v \rightsquigarrow w | \pi} \hat{\nu}_w(\pi)$ , the introduced error is  $(\mu_v(\pi) p_{v \rightsquigarrow w | \pi} \nu_w(\pi) - \hat{\mu}_v(\pi) p_{v \rightsquigarrow w | \pi} \hat{\nu}_w(\pi))$ . Using Lemma 1, the error is

$$\leq \left( \frac{\epsilon}{3} \mu_v(\pi) \hat{\nu}_w(\pi) + \frac{\epsilon}{3} \hat{\mu}_v(\pi) \nu_w(\pi) + \frac{\epsilon^2}{3^2} \mu_v(\pi) \nu_w(\pi) \right) p_{v \rightsquigarrow w | \pi} \leq \epsilon \mu_v(\pi) p_{v \rightsquigarrow w | \pi} \nu_w(\pi)$$

where the last inequality holds because the rounded value always underestimates the true value.

Similarly, the error for the term  $\hat{\mu}_w(\pi) p_{w \rightsquigarrow v | \pi} \hat{\nu}_v(\pi)$  is bounded by  $\epsilon \mu_w(\pi) p_{w \rightsquigarrow v | \pi} \nu_v(\pi)$ . For the term  $h_u \hat{\mu}_u^{sum}$ , the error is  $h_u(\mu_u(\pi) - \hat{\mu}_u^{sum}(\pi))$ . By using Lemma 1, the error is bounded by  $h_u \frac{\epsilon}{3}(\mu_u(\pi) - h_u)$ . Similarly, the error for the term  $h_u \hat{\nu}_u^{sum}$  is bounded by  $h_u \frac{\epsilon}{3}(\nu_u(\pi) - h_u)$ . In addition, by the inductive assumption, the errors for  $\hat{z}_v(\pi)$  and  $\hat{z}_w(\pi)$  are bounded by  $\epsilon z_v(\pi)$  and  $\epsilon z_w(\pi)$  respectively.

Therefore, the total error for the enumerator of Equation (6) is bounded by

$$\epsilon(z_v(\pi) + z_w(\pi) + \mu_v(\pi) p_{v \rightsquigarrow w | \pi} \nu_w(\pi) + \mu_w(\pi) p_{w \rightsquigarrow v | \pi} \nu_v(\pi) + h_u \nu_{\cdot, u}(\pi) + h_u \mu_u(\pi) - 2 \cdot h_u^2)$$

According to the definition of  $\hat{z}_u(\pi)$  in Equation (6), the enumerator is divided by  $K_u^z$ , rounded and then multiplied by  $K_u^z$ . These operations introduce an additional error  $K_u^z$ , which is bounded by  $\epsilon h_u^2$  based on condition (7) in the paper. By adding the error to the total error above, the error  $z_u(\pi) - \hat{z}_u(\pi)$  is bounded by  $\epsilon z_u(\pi)$  where the expression of  $z_u(\pi)$  is shown in Equation (4) in the paper. Hence, the statement holds for  $u$ .

Finally, as defined in the paper,  $z(\pi) = z_{root}(\pi)$  and  $\hat{z}(\pi) = \hat{z}_{root}(\pi)$ . Therefore, the lemma holds.  $\square$

**Derivation of the last inequality used to prove Theorem 3.**

$$\max_{0 \leq k \leq (n-1)} \frac{c}{\epsilon^6} (k^4(n-k-1)^4 + k^8 + (n-k-1)^8) \leq c \frac{n^8}{\epsilon^6}$$

*Proof.* First, we show for any integer  $k \in [0, n-1]$  that

$$\begin{aligned}
& k^4(n-k-1)^4 + k^8 + (n-k-1)^8 \\
& \leq 2k^4(n-k-1)^4 + k^8 + (n-k-1)^8 \\
& = (k^4 + (n-k-1)^4)^2 \\
& \leq (k^4 + 2k^2(n-k-1)^2 + (n-k-1)^4)^2 = \left((k^2 + (n-k-1)^2)^2\right)^2 \\
& \leq \left((k^2 + 2k(n-k-1) + (n-k-1)^2)^4\right)^4 = \left((k+n-k-1)^2\right)^4 \\
& = (n-1)^8 \leq n^8
\end{aligned}$$

Therefore, we have

$$\max_{0 \leq k \leq (n-1)} k^4(n-k-1)^4 + k^8 + (n-k-1)^8 \leq n^8$$

which proves the fact. □
